## 1 **Title**

2 An integrated approach to assess Knowledge, Attitude and Practices (KAP) regarding  
3 major Neglected Tropical Diseases endemic in the Mbengwi health district (North West  
4 Region, Cameroon)

5

## 6 **Short title**

7 Integrated KAP survey for NTDs

8

## 9 **Authors and Affiliations**

10 Laurentine Sumo<sup>1</sup>, Cédric G Lenou-Nanga<sup>2</sup>, Ngum H Ntonifor<sup>1</sup>, Nicanor Chenkumo-  
11 Kengmoni<sup>1</sup>, Vanessa T Amana-Bokagne<sup>1</sup>, Chembo G Awah<sup>1</sup>, Yannick Niamsi-Emalio<sup>2</sup>,  
12 Hugues C Nana-Djeunga<sup>2,3,&</sup>

13

14 <sup>1</sup>Department of Biological Sciences, Faculty of Science, University of Bamenda, PO Box  
15 39 Bambili, Cameroon

16

17 <sup>2</sup>Centre for Research on Filariasis and other tropical Diseases (CRFilMT), P.O. Box 5797,  
18 Yaounde, Cameroon

19

20 <sup>3</sup>Parasitology and Ecology Laboratory, Department of Animal Biology and Physiology,  
21 Faculty of Science, P.O. Box 812, University of Yaounde 1, Yaounde, Cameroon

22

23 & Correspondence: e-mail: [nanadjeunga@crfilmt.org](mailto:nanadjeunga@crfilmt.org); Tel.: 00237 699 07 64 99; PO Box  
24 5797 Yaounde, Cameroon

## 1 **Abstract**

2 **Background:** Preventive chemotherapy (PCT) is the main strategy currently used to  
3 control and/or eliminate onchocerciasis (Oncho), lymphatic filariasis (LF) and Soil  
4 Transmitted Helminthiasis (STH), and community participation (through  
5 implementation of MDA or adherence to PCT) is critical to achieve this goal. However,  
6 these Neglected Tropical Diseases (NTDs) are still persisting in most endemic areas as a  
7 consequence of sub-optimal treatment coverage, the presence of systematic non-  
8 compliers in communities ... This study aimed at investigating whether the knowledge,  
9 attitudes and practices of populations about these NTDs can explain the poor trends  
10 towards elimination.

11  
12 **Methodology:** A cross-sectional survey was carried out in the Mbengwi Health District  
13 (North West Region, Cameroon) using the cluster sampling technique. Clusters were  
14 selected using the Probability Proportionate to Estimate Size strategy. In each cluster,  
15 the random walk technique was used for the selection of households, and a structure  
16 questionnaire was administered to 2-3 of its members.

17  
18 **Principal Findings:** A total of 254 households from 26 clusters were visited, and 514  
19 individuals were interviewed. The sex ratio of interviewees (1.08) was unbiased, and  
20 their ages ranged between 10 and 99 years old. Though most of the respondents  
21 declared having already heard of these NTDs (41.2%, 73.7% and 89.9% for Oncho, LF  
22 and STH respectively), only a minority of them were aware of correct response of how  
23 they are acquired/transmitted (3.7%, 6.8% and 12.5% for Oncho, LF and STH  
24 respectively), and prevented (23.1%, 18.9% and 47.2% for Oncho, LF and STH  
25 respectively). Even when respondents were aware that medicines were useful to

1 prevent and/or treat these NTDs, almost none of them knew the drug used or the  
2 treatment frequency.

3

4 **Conclusion/Significance:** This study reveals that interviewees exhibit poor knowledge,  
5 attitudes and practices as regards to these NTDs, although they are endemic in the study  
6 area and PCTs given yearly since a while. These misconceptions can seriously affect the  
7 adherence and contribution of populations to the success of PCTs, and it appears  
8 compulsory to improve individual knowledge, with a focus on the importance and  
9 rationale behind MDA, to optimize their attitudes and practices, especially community  
10 participation to PCTs.

11

12 **Keywords:** Lymphatic Filariasis, Onchocerciasis, Soil transmitted helminthiasis, KAP,  
13 Mbengwi health district, Cameroon

14

15

## 16 **Author summary**

17 The control and/or elimination of Neglected Tropical Diseases (NTDs) are currently on  
18 top of the agenda of endemic countries' control programs and stakeholders. Ivermectin-  
19 and Albendazole/Mebendazole-based mass distribution is currently the main strategy to  
20 control/interrupt transmission of onchocerciasis, lymphatic filariasis and soil-  
21 transmitted helminthiasis, and adherence of communities is compulsory for the success  
22 of this approach. Despite the success registered in the fight against these diseases, the  
23 trend towards elimination remains unsatisfactory in many endemic areas. This study  
24 was carried out to assess whether the perceptions, attitudes, and practices of the  
25 Mbengwi health district (North West Region, Cameroon) populations regarding these

1 three parasitic diseases can explain the poor trend towards elimination. A cross-  
2 sectional study revealed important misconceptions about these NTDs amongst most of  
3 the respondents, which can clearly affect their adherence and contribution to the  
4 success of preventive chemotherapies, and seriously slower the momentum towards  
5 elimination.

6

7

## 8 **Introduction**

9 Neglected Tropical Diseases (NTDs) are among the world's most common conditions  
10 prevailing in tropical and subtropical settings and disproportionately affecting the  
11 poorest [1]. Since the update of the NTD portfolio in 2017 by the addition of  
12 chromoblastomycosis and other deep mycoses, scabies and other ectoparasites and  
13 snakebite envenoming [2], the burden of NTDs is yet to be updated. The previously  
14 known 17 NTDs were recognized to affect more than 2 billion people in developing  
15 countries in 2013, STH infections (ascariasis, trichuriasis, and  
16 ancylostomiasis/necatoriasis) accounting for more than three-quarters of the total NTD  
17 infections prevalence. In addition to their morbidity, the number of death attributable to  
18 the 17 NTDs prioritized by the WHO plus “other NTDs” in 2013 was estimated to be  
19 equivalent to more than half of the malaria deaths and more than double due to  
20 tuberculosis [3-5].

21

22 Despite their high burdens, these NTDs are preventable and/or treatable. The control  
23 and/or elimination of these NTDs are now on top of the agenda of endemic countries’  
24 control programs and stakeholders in their efforts to achieve Millennium Development  
25 Goals for sustainable poverty reduction [3, 6]. Five public-health interventions - (i)

1 preventive chemotherapy (PCT), (ii) innovative and intensified disease management,  
2 (iii) vector control and pesticide management, (iv) safe drinking-water, basic sanitation  
3 and hygiene services, and education, (v) zoonotic disease management - have been  
4 identified to accelerate the prevention, control, elimination and eradication of NTDs,  
5 more effective impact being achieved when these interventions are combined [1].

6

7 Success in controlling these NTDs have recently been achieved in a number of countries  
8 [7], but the trends towards elimination remains poor or unsatisfactory. Indeed, these  
9 NTDs are still persisting in most endemic areas, especially when long-term sustainable  
10 efforts are required as it is the case of the five major 'tool-ready' NTDs (lymphatic  
11 filariasis, onchocerciasis, schistosomiasis, soil-transmitted helminthiasis and trachoma).  
12 Among the reasons identified to hinder the elimination of these NTDs, sub-optimal  
13 treatment coverage and the presence of systematic non-compliers in communities are  
14 significant. The implication and contribution/participation of populations in this  
15 machinery, through implementation of MDA or adherence to PCT, are highly needed and  
16 can appear critical in the momentum towards elimination. For instance, it was  
17 demonstrated that black fly biting rates have declined by 89-99% after members of  
18 some communities in Northern Uganda have been mobilized to "slash and clear" the  
19 breeding sites of the vegetation that represents the primary onchocerciasis vector larvae  
20 attachment point [8]. It was argued that water, sanitation, and hygiene interventions as  
21 well as their combination, are effective at reducing STH infections [9], though most of  
22 the children interviewed in the framework of a study conducted in Senegal declared that  
23 they usually defecate somewhere else, though their communities were well endowed  
24 with pit latrines [10]. This means that the appropriation of control measures by the

1 populations is a key point, and this can be made through appropriate education of  
2 endemic communities to improve their knowledge regarding these infections.

3

4 The objective of this study was to assess knowledge and perceptions of populations, in  
5 relation to their attitudes and practices, regarding the most prevalent NTDs in the  
6 Mbengwi Health District (North West Region, Cameroon).

7

8

## 9 **Methods**

### 10 **Ethical statement**

11 Ethical clearance was granted by the Institutional Review Board of the Faculty of Science  
12 of the University of Bamenda. After approval of the local administrative and traditional  
13 authorities, the objectives and schedules of the study were explained to community  
14 leaders and to all eligible individuals selected in the household. Verbal agreements were  
15 obtained from those who agree to participate. The approval of parents or legal guardians  
16 of minors was necessary before any procedure. An individual code was attributed to  
17 each participant for anonymous data analysis.

18

### 19 **Study area and populations**

20 Mbengwi (6°01'N, 10°00'E) is the capital of the Momo Division (North West Region,  
21 Cameroon), situated at about 20 km to the west of Bamenda town, the Regional capital,  
22 and at an altitude ranging from 900m to 2000m above sea level. The hydrographic  
23 network is intricate with many streams and springs (the Momo division is mainly  
24 irrigated by the Momo River), and the area has a huge hydroelectricity potential  
25 afforded by the Abi falls. The climate of the Mbengwi health district is of mountain

1 monsoon equatorial type, with a short dry season running from September to March,  
2 and a long rainy season extending from March to September. The annual average rainfall  
3 is 2022.3 mm, and the average maximum yearly temperature is 30°C [11-12]. This area  
4 is characterized with a long valley stretch surrounded by mountains (most of them  
5 counting at least 1500m in height) and lies in the transitional zone between the western  
6 grass fields and forest region. It is highly dominated by the savannah vegetation  
7 (especially on the hills) which favors animal rearing. The valley is mainly made up of  
8 trees (palm trees, raffia palms and many fruit trees), and is favorable for settlement and  
9 agriculture. Forest characteristics are highly observed at the western part of the area  
10 and favors the cultivation of cash crops like cocoa [11-12].

11

## 12 **Study design and sampling strategy**

13 This study was designed as a representative 2-staged clustered cross-sectional  
14 household and questionnaire-based survey. Clusters (communities) were selected using  
15 the Probability Proportional to Estimate Size (PPES) strategy [13], and in each selected  
16 community, the random walk technique [14] was used for households' selection. In each  
17 selected household, 1-3 individuals from different age classes - 10-20 years old, 21-30  
18 years old and 31 years and over (usually the head of household) - were randomly  
19 selected and underwent in-depth interviews. A structured questionnaire was  
20 administered by three trained interviewers, assisted by autochthones speaking the local  
21 language, to collect participants' socio-demographic and socio-economic characteristics  
22 (gender, age, village of residence, profession, educational level, means of locomotion),  
23 and to assess whether they have ever heard about the targeted NTDs (onchocerciasis,  
24 lymphatic filariasis and soil transmitted helminthiasis), as well as the level of their  
25 knowledge in relation to their attitudes and practices as regards to the mode of

1 transmission, clinical manifestations and the means to prevent and treat these parasitic  
2 diseases.

3

#### 4 **Data analysis**

5 All relevant data were recorded into a purpose-built Microsoft Access database and  
6 subsequently transferred to R software, version 3.4.4 (The R Foundation for Statistical  
7 Computing) for statistical analysis. Categorical variables (gender, occupation,  
8 urbanization) were summarized using frequencies, and continuous variables (age) were  
9 described using median (interquartile range, IQR).

10

11 To better evaluate respondents' knowledge, attitude and practices, a score between 0  
12 and 2.5 was allocated to each question, either related to participants' knowledge or to  
13 their attitudes and practices as regards to each targeted NTDs (Supplementary material  
14 Table S1). The overall score for a given study participant was the sum of all responses  
15 for a specific disease. Respondents whose scores were equal and above the mean (over a  
16 total of 10) were considered as having 'good knowledge, attitude and practice' (coded as  
17 1), while those below the mean were considered as having 'poor knowledge, attitude  
18 and practice' (coded as 0). Associations between a KAP score and different respondents'  
19 socio-demographic and socio-economic characteristics were tested using the Chi-Square  
20 and Fisher exact probability tests.

21

22 The Classification and Regression Tree (CART) was used to assess the association  
23 between socio-demographic characteristics and respondents' knowledge, attitude and  
24 practice scores for each of the targeted diseases. Indeed, CART is a non-parametric  
25 multiple regression approach that both avoids multicollinearity issues and explains a



1 categorical dependent variable by defining groups of subjects with similar behaviors  
2 [15-16], while taking into account all interactions between different covariates [17].  
3 CART then evaluates all the possible thresholds and separates the dependent variable  
4 into two groups, the procedure being repeated recursively until an optimal criterion is  
5 obtained [18]. This leads to the selection and editing of an optimal decision tree where  
6 the leaves correspond to similar behavior classes. Odds ratio (OR) with 95% CI  
7 generated using logistic regression models were then used to describe the strength of  
8 association between the response variable or outcome (KAP scores) and independent  
9 variables (behavioral classes) before and after controlling for possible confounding  
10 variables. Non-overlapping 95% CI or  $p$ -values  $\leq 5\%$  were considered as statistically  
11 significant.

12

13

## 14 **Results**

### 15 **Socio-demographic and socio-economic status of study participants**

16 Table 1 summarizes socio-demographic and socio-economic characteristics of the  
17 survey respondents. A total of 254 households selected in 26 clusters were visited  
18 across the Mbengwi health district, and 514 participants interviewed. The sex ratio  
19 (Male / Female) of enrollees was 1.08, their age ranging between 10 and 99 years old  
20 (median: 35 years old; IQR: 23 - 49 years old). The educational level of most of the study  
21 participants was primary/secondary (84.1%), only a few being illiterate. More than half  
22 (50.4%) of the interviewees were farmers, living almost exclusively in rural (46.5%) and  
23 semi-rural/semi-urban (40.8%) settings, most of them using motorbike (58.2%) as  
24 means of locomotion.

1

## 2 **Awareness of the targeted NTDs**

3 More than half of respondents (58.4%) indicated that they have never heard about  
4 onchocerciasis (Table 2). For those who were aware of this debilitating disease, the most  
5 common information sources were community members (42.2%) and health personnel  
6 (41.1%). Regarding LF, 379 (73.7%) respondents indicated that they had already heard  
7 about this filarial infection, the most common source of information being community  
8 members (Table 2). STH infections were well known to the respondents (89.9%), mostly  
9 from health personnel (61.5%) (Table 2).

10

## 11 **Knowledge of modes of transmission**

12 Among those who were aware of these diseases, only few of them (16.0%) identified  
13 black flies as the river blindness transmission agent (Table 2). A similar situation was  
14 observed for LF, less than quarter (10%) of the respondents indicating that mosquito act  
15 as vector (Table 2). Likewise awareness, respondents' knowledge of STH transmission  
16 was higher as compared to onchocerciasis and LF, though remaining low (Table 2).

17

## 18 **Knowledge about clinical manifestations**

19 Of the respondents who were aware of onchocerciasis, an important proportion of study  
20 participants (73.1%) identified eye lesions among clinical signs (Table 2). Elephantiasis  
21 of lower limb was reported by 87.0% of those who were aware of LF, while only 2.3% of  
22 them identified hydroceles as one of the LF clinical sign (Table 2). Stomachache (71.2%),  
23 diarrhea (16.2%) and vomiting (15.0%) were the main clinical manifestations reported  
24 by study participants who were aware of STH infections (Table 2).

25

## 1 **Knowledge regarding prevention and treatment approaches**

2 Of those respondents who were aware of onchocerciasis, prevention and treatment  
3 approaches were not known by more than half of the respondents. Among those  
4 participants who knew that medicines can be used for chemoprevention (19.3%) or  
5 chemotherapy (43.1%), only few of them knew that ivermectin was the drug routinely  
6 used (Table 2). Overall, 41.0% and 19.8% of the respondents presented with good  
7 scores of knowledge and attitudes/practices, respectively (Supplementary material  
8 Table S1). Less than quarter (14.2%) of the respondents who were aware of LF choose  
9 chemotherapy as the most effective way to prevent this disease, and only few of them  
10 indicated that killing mosquitoes (3.0%) by for example using bed nets (1.3%) can be  
11 used as another means of LF prevention. As for onchocerciasis, a relatively high  
12 proportion of study participants (30.1%) declared that conventional medicines can be  
13 used for chemotherapy, but only a few knew that ivermectin is the commonly used drug  
14 (Table 3). Overall, 64.4% and 28.8% of the respondents received good scores of  
15 knowledge and attitudes/practices, respectively (Supplementary material Table S1).  
16 Among respondents who were aware of STH infections, 29.4% and 17.6% reported the  
17 use of conventional medicine and applying good hygiene measures, respectively, as the  
18 prevention means. Also, a large majority (71.1%) of study participants declared that  
19 conventional medicine can be used to treat STH infections, though only a few knew that  
20 the routinely used drugs are Ablbendazole and Mebendazole. In addition, 74.0% and  
21 34.6% of the respondents presented with scores of knowledge and attitudes/practices,  
22 respectively (Supplementary material Table S1).

23

## 24 **Association between KAP scores of targeted NTDs and different covariates**

1 The univariate analysis has been conducted to assess the association between KAP  
2 scores and socio-demographic co-variables (age, level of education, occupation and level  
3 of urbanization) recorded in the framework of this study (Supplementary material Table  
4 S2). Study participants' knowledge was positively associated with the level of education  
5 (both for onchocerciasis and LF;  $p < 0.027$ ) and age (LF only;  $p < 0.001$ ). The  
6 respondents' scores of knowledge about STH were significantly higher amongst teacher  
7 and student as compared to the other occupational groups ( $p < 0.001$ ), better in the  
8 Rural settings compared to the urban settings (3.11 vs 2.81,  $p < 0.001$ ). Study  
9 participants' attitudes and practices scores were similar among the different socio-  
10 demographic and socio-economic variables for onchocerciasis and lymphatic filariasis,  
11 but significantly increased with age ( $p = 0.031$ ) and were associated with occupation ( $p$   
12  $< 0.001$ ) for STH.

13  
14 The multivariate analysis was performed using the CART approach to better identify the  
15 socio-demographic and socio-economic determinants associated with KAP of the study  
16 participants. Regarding onchocerciasis, the determinants were grouped into 7 classes  
17 (Figure 1). Three classes of determinants - class 5 (students or traders over 21 years  
18 with at least secondary education and living in urban or semi-urban areas), class 6  
19 (technicians or traders or students over 21 years with at least secondary education and  
20 living in rural areas) and class 7 (teachers) - presented with better knowledge than the  
21 reference class 1 (driver, farmer or other trades) ( $p < 0.006$ ). However, no significant  
22 association was found between respondents' attitudes and practices and these socio-  
23 demographic and socio-economic classes (Figure 1, Supplementary material Table S3).  
24 As for lymphatic filariasis, CART enable to organize socio-demographic and socio-  
25 economic determinants into 8 classes (Figure 2). Study participants from socio-

1 demographic and socio-economic class 8 (drivers or teachers or technician or trader)  
2 had better knowledge than individuals from the reference class 7 (farmers or students  
3 over 21 years of age living in rural or urban areas) (OR: 2.065, 95% CI: 1.19 - 3.71,  $p =$   
4 0.012). At the contrary of class 8, class 1 (farmers or students under 21 years, having  
5 made at most primary) and class 4 (farmers and others over 21 years with a level of  
6 education other than the primary and living in semi-urban areas) presented with poor  
7 knowledge compared to the reference class 7 (OR: 0.119, 95% CI: 0.03 - 0.31,  $p < 0.001$ ),  
8 (OR: 0.290, 95% CI: 0.14 - 0.58,  $p < 0.001$ ), respectively. No significant difference was  
9 found between the attitudes and practices scores and the different classes of socio-  
10 demographic and socio-economic status of the respondents ( $p = 0.217$ ) (Supplementary  
11 material Table S4). For STH infections, CART led to the organization of socio-  
12 demographic and socio-economic determinants into three main classes (Figure 3).  
13 Study participants belonging to class 2 (students or other workers who attended) had  
14 poor knowledge of STH compared to the reference class 3 (worker driver + farmer +  
15 technician + teacher + trader) (OR: 0.359, 95% CI: 0.22 - 0.57,  $p < 0.001$ ). Contrarily to  
16 onchocerciasis and lymphatic filariasis, attitudes and practices of study participants  
17 with regards to STH infections was associated with socio-demographic and socio-  
18 economic determinants ( $p < 0.001$ ). Respondents from class 2 (students or other workers)  
19 presented with inappropriate attitudes and practices with regards with STH infections  
20 compared to the reference class 3 (worker driver + farmer + technician + teacher +  
21 trader) (OR: 0.359, 95% CI: 0.22 - 0.57,  $p < 0.001$ ) (Supplementary material Table S5).

22

### 23 **Relationship between knowledge of respondents and their attitudes/practices**

24 Onchocerciasis knowledge was significantly associated with respondents' attitudes and  
25 practices (Correlation Coefficient ( $\rho$ ) = 0.64,  $p < 0.001$ ), study participants with good

1 knowledge exhibiting the better attitudes and practices. A similar positive relationship  
2 trends between respondents' knowledge about LF and STH infections, and their  
3 attitudes and practices was also observed ( $\rho = 0.46$ ,  $p < 0.001$ ) and ( $\rho = 0.46$ ,  $p$   
4  $< 0.001$ ), respectively.

## 7 **Discussion**

8 The purpose of this study was to assess, through an integrated approach, the attitudes  
9 and practices of the Mbengwi health district populations, in relation to their level of  
10 knowledge regarding three of the five major NTDs endemic in this area.

11  
12 The awareness of study participants was quite variable from one NTD to another.  
13 Indeed, more than half of the study participants declared that they had never heard  
14 about onchocerciasis, though the fight against this disease is ongoing and already  
15 implemented in this health district for more than 15 years. These findings are  
16 contrasting to those collected in Ethiopia [19] where the majority of the study  
17 participants were familiar with onchocerciasis; this might be explained by the fact that  
18 this filarial disease is not as severe in the Mbengwi health district () as in Ethiopia  
19 where the endemicity of the disease was high, ranging from 6.9% in the Quara District in  
20 northwest Ethiopia, to 85.3% in Teppi in South western [20]. Unlike onchocerciasis, the  
21 majority of participants (73.7%) had already heard about LF, from a community  
22 member for most of them. This can be explained by the fact that the disease is commonly  
23 called elephantiasis, in reference to its most important and visible clinical manifestation.  
24 However, these findings are not in line with those collected in Nigeria which revealed  
25 that although the region was endemic to LF, the majority of participants (82.1%) were

1 not aware of the disease [21]. Likewise lymphatic filariasis, most of the respondents  
2 (89.9%) were well aware of STH infections, mostly from health personnel (61.5%).  
3 Indeed, STH are the most widespread NTD over the world, with more than 1.5 billion  
4 people infected (~1/4 of the world population). These results corroborate those by  
5 Yusof et al. (2017) [22] and Nath et al. (2018) [23] who reported high awareness about  
6 STH (62.5%), health workers being the main source of information.

7  
8 The knowledge of routes of transmission was in general poor, regardless the targeted  
9 disease. Indeed, among those who have ever heard about onchocerciasis, 68.3% didn't  
10 knew that the vector is black fly, likely due to the low abundance of this vector in the  
11 study area. These results are not in line with the findings by Yirga et al. (2008) [24] in a  
12 study conducted in Southwest Ethiopia where the majority of the respondents  
13 associated the disease to the bite of black flies. Likewise onchocerciasis, the majority of  
14 participants did not know that mosquito is the vector of lymphatic filariasis, as was also  
15 previously observed elsewhere [25-26]. Regarding STH infections, 55.2% of participants  
16 didn't know how this NTD is transmitted, contrarily to the finding by Nath et al. (2018)  
17 [23] where school-aged children were aware that STH are transmitted through  
18 contaminated soil (58.1%) and unhygienic practices (55.7%). In Cameroon, the  
19 Schistosomiasis and Soil Transmitted Helminthiasis National Control program is based  
20 on the deworming of school-aged children by their teachers. Thus, during the treatment  
21 campaigns in primary schools, the out-target population (included in this study) is not  
22 educated about the disease and might explain why study participants were so little  
23 familiar with the modes of transmission of STH.

24

1 Regarding knowledge of clinical manifestations, most of the study participants (73.1%)  
2 identified eye disease as a clinical manifestation of onchocerciasis, probably in reference  
3 to the common name of onchocerciasis, river blindness. Such high level of clinical  
4 manifestation knowledge has been observed in a study by Weldegebreal et al. (2014)  
5 [19], the most reported clinical sign being however itching. A similar trend was  
6 observed with lymphatic filariasis, 87.0% of respondents reporting elephantiasis as the  
7 main clinical manifestation. These results corroborate those by Amaechi and colleagues  
8 (2016) [21] who reported swellings (84.6%) as the most common responses symptoms  
9 in Omi irrigation community at North Central of Nigeria. Also, most of the study  
10 participants identified stomachache and diarrhea (87.4%) as the main STH clinical  
11 manifestations, as was previously reported in a study conducted in two rural  
12 communities of western Ivory Coast [27]. In general, the knowledge of populations as  
13 regards with clinical signs of any of the targeted NTDs was high, more likely because  
14 these diseases are usually assimilated to their most prominent symptoms.

15

16 The majority of study participants (69.1%) was not aware of onchocerciasis prevention  
17 means, and almost half of them (53.0%) ignored how to treat this filarial disease. This  
18 was quite surprising, especially because the fight against this disease through the CDTI  
19 is implemented in this health district since more than 15 years, with acceptable  
20 therapeutic coverage. It is worth to however mention that CDTI is critically deviating  
21 from its initial pathway, with absence of health education at the community level,  
22 reduced commitment of CDDs, poor training and supervision, no more self-monitoring  
23 by communities ..., and might likely explain why populations can adhere to treatment  
24 without knowing onchocerciasis prevention and control measures. These results are not  
25 in line with those of Weldegebreal et al. (2014) [19] in Nigeria where almost all (93.3%)



1 the respondents believed that onchocerciasis is preventable, and 88.4% of them knew  
2 that ivermectin is the drug of choice. Regarding lymphatic filariasis, a very little  
3 proportion knew LF prevention and treatment strategies, contrarily to what was  
4 previously reported in the Omi community in Nigeria, where 61.8% knew how to  
5 prevent lymphatic filariasis, and 49.8% reported the use of anti-filarial drug [21]. This  
6 might be explained by the deviation observed in CDTI implementation, onchocerciasis  
7 and lymphatic filariasis being implemented following the same approach and by the  
8 same actors. More than half of the study participants knew how to prevent STH  
9 infections, and 71.1% of them knew that this disease can be treated using drugs, though  
10 almost none knew exactly which drug is usually used. These findings were in line with  
11 those by Nath and colleagues (2018) [23] in Bangladesh where 64.4% of school-aged  
12 children interviewed declared preventing STH by washing hands after defecation, and  
13 75.6% of them knew that to control STH they should take drugs.

14

15 Multivariate logistic regression revealed that knowledge of these three group of diseases  
16 was associated with age of enrollees, their level of education, their occupation and the  
17 level of urbanization. Indeed, those individuals aged  $\geq 21$  years old, who have attended at  
18 least the secondary school, who were student/teachers and living in urban settings  
19 exhibited in general better knowledge as regards to these diseases. Though these factors  
20 have also been observed in previous onchocerciasis, lymphatic filariasis and STH related  
21 studies [21, 28]), other determinants, not necessarily evaluated in the framework of this  
22 study, might also be associated with of knowledge of populations. For example, in a  
23 previous study on onchocerciasis [19], only ethnicity was associated with knowledge,  
24 attitudes and practices of populations.

25

1 Finally, a positive association was found between knowledge of respondents and their  
2 attitudes and practices with regard to the three targeted NTDs, suggesting that the  
3 better populations are educated, the most they can be aware of the importance of  
4 control measures and thus better comply.

5  
6 This study revealed that study participants exhibit poor knowledge, attitudes and  
7 practices as regards to these three PCT-based highly prevalent diseases, although they  
8 are endemic in the study area and MDA administered yearly since decades.  
9 Misconceptions can seriously affect the adherence and contribution of populations to  
10 the success of PCTs, and consequently elimination of targeted diseases. Since lack/poor  
11 knowledge and wrong beliefs could lead to inappropriate control measures, it appears  
12 compulsory to improve individual knowledge, with a focus on the importance and  
13 rationale behind MDA, to optimize their attitudes and practices, especially community  
14 participation to PCTs.

15

16

## 17 **Acknowledgements**

18 The authors are grateful to the population of the Mbengwi health district who willingly  
19 accept to participate in this study.

20

21

## 22 **References**

23 1. WHO (2018). Neglected tropical diseases.  
24 [https://www.who.int/neglected\\_diseases/diseases/en/](https://www.who.int/neglected_diseases/diseases/en/). Accessed May 21, 2019.

- 1 2. WHO (2017) Report of the Tenth Meeting of the WHO Strategic and Technical  
2 Advisory Group for Neglected Tropical Diseases. 29-30 March 2017 WHO, Geneva.  
3 19p.
- 4 3. Hotez PJ, Kamath A (2009) Neglected tropical diseases in sub-saharan Africa:  
5 review of their prevalence, distribution, and disease burden. PLoS Negl Trop  
6 Dis vol3: 8
- 7 4. Collaborators GBD 2013 Mortality and Causes of Death (2014) Global, regional,  
8 and national age-sex specific all-cause and cause-specific mortality for 240 causes  
9 of death, 1990-2013 a systematic analysis for the Global Burden of Disease  
10 Study. Lancet 385 (9963): 11771 (PMID 25530442, DOI 10.1016/S0140-  
11 6736(14)61682-2)
- 12 5. Herricks JR, Hotez PJ, Wanga V, Coffeng LE, Haagsma JA, Basañez M-G, et al.  
13 (2017) The global burden of disease study 2013: What does it mean for the NTDs?  
14 PLoS Negl Trop Dis 11(8): e0005424.
- 15 6. Molyneux, D.H., Hotez, P.J. & Fenwick, A (2005) "Rapid-impact interventions": how  
16 a policy of integrated control for Africa's neglected tropical diseases could benefit  
17 the poor. PLoS Med. 2, e336.
- 18 7. Zhang et al. (2010) Control of neglected tropical diseases needs a long-term  
19 commitment. BMC Medicine 8:67.
- 20 8. Jacob BG, Loum D, Lakwo TL, Katholi CR, Habomugisha P, Byamukama E, et al.  
21 (2018) Community-directed vector control to supplement mass drug distribution  
22 for onchocerciasis elimination in the Madi mid-North focus of Northern Uganda.  
23 PLoS Negl Trop Dis 12(8): e0006702.
- 24 9. Fewtrell L, Kaufmann RB, Kay D, Enanoria W, Haller L, Colford JM., Jr (2005) Water,  
25 sanitation, and hygiene interventions to reduce diarrhoea in less developed  
26 countries: A systematic review and meta-analysis. Lancet Infect Dis 5:42-52.
- 27 10. Sow S, de Vlas SJ, Polman K, Gryseels B. (2004) Hygiene practices and  
28 contamination risks of surface waters by schistosome eggs: The case of an infested  
29 village in Northern Senegal. Bull Soc Pathol Ex. 7:12-4.
- 30 11. PNDP (2012) Mbengwi Council development plan: elaborated with the Technical  
31 and Financial Support of the National Community Driven Development Program  
32 (PNDP). 151p.
- 33 12. National Institute of Cartography (NIC) and Ministry of Economy Planning and  
34 Regional Development Cameroon (MINEPAT) (2013). National Atlas of Physical  
35 Development of Cameroon.  
36 [https://fr.slideshare.net/ninonjopkou/positionnement-gographique-des-activites-](https://fr.slideshare.net/ninonjopkou/positionnement-gographique-des-activites-conomiques-du-cameroun)  
37 [conomiques-du-cameroun](https://fr.slideshare.net/ninonjopkou/positionnement-gographique-des-activites-conomiques-du-cameroun). Accessed May 16, 2018.
- 38 13. Alam M, Sumy SA, Parh YA (2015) Selection of the Samples with Probability  
39 Proportional to Size. Science Journal of Applied Mathematics and Statistics 3 (5):  
40 230-233
- 41 14. Flynn A, Tremblay FP, Rehm J, Wells S (2013) A modified random walk door-to-  
42 door recruitment strategy for collecting social and biological data relating to  
43 mental health, substance use, addiction, and violence problems in a Canadian  
44 community. J Alcohol Drug Res 09; 2(2): 7-16.

- 1 15. Breiman L, Friedman JH, Olshen RA, Stone CJ (1984) Classification and regression  
2 trees. Belmont (CA): Wadsworth.
- 3 16. Bierman A, Brown A, Levinton C (2015) Using decision trees for measuring gender  
4 equity in the timing of angiography in patients with acute coronary syndrome: a  
5 novel approach to equity analysis. *J Equity Health* 14:155
- 6 17. Tung H, Chen C, Lin K, Chou N, Lee J, Cliniciu D, Lien R (2012): Classification and  
7 regression tree analysis in acute coronary syndrome patients. *World J Cardiovasc*  
8 *Dis* 2: 177-183
- 9 18. Piarroux M, Piarroux R, Knapp J, Bardonnnet K, Dumortier J, Watelet J, et al. (2013)  
10 Populations at Risk for Alveolar Echinococcosis, France. *Emerg Infect Dis*  
11 19(5):721-728.
- 12 19. Weldegebreal F, Medhin G, Weldegebriel Z and Legesse M (2014) Assessment of  
13 community's knowledge, attitude and practice about onchocerciasis and  
14 community directed treatment with Ivermectin in Quara District, north western  
15 Ethiopia. *Parasites & Vectors* 7:98
- 16 20. Rasheed MU (2007) Onchocerciasis in Different Regions of Ethiopia. *The Inter JPar*  
17 *Dis* 1:1
- 18 21. Amaechi E, Ohaeri C, Mkpola UO, Nwachukwu C, Ukoha U (2016) Lymphatic  
19 filariasis: knowledge, attitude and practices among inhabitants of an irrigation  
20 project community, North Central Nigeria. *Asian Pac J Trop Dis* 6(9): 709-713
- 21 22. Yusof A and Lokman M (2017) Intestinal Helminths and Protozoa Infection among  
22 Parents of School Children in Malaysia. *Journal of BSHR* 1(3):75-82
- 23 23. Nath TC, Padmawati RS, Alam MS, Das S, Murhandarwati EH (2018) Elimination of  
24 soil-transmitted helminthiasis infection in Bangladesh: knowledge, attitudes,  
25 and practices regarding mass drug administration. *J Glob Health Rep* 2: e2018017.
- 26 24. Yirga D, Woldemichael K, Wondafrash M, Kassahun W, Deribe K (2008) Knowledge  
27 and Belief about Cause and Prevention of Onchocerciasis in Bebeke, Southwest  
28 Ethiopia. *Ethiop J Health Sci* 18:66 – 68.
- 29 25. Yesuf A (2006) Assessment of KAP of CDTI of onchocerciasis among the  
30 communities around Seqa area, southwestern Ethiopia. Addis Ababa, Ethiopia:  
31 MSC. Thesis, Addis Ababa University.
- 32 26. Akogun OB, Akogun MK, Audu Z (2000) Community perceived benefits of  
33 ivermectin treatment in North Eastern Nigeria. *Soc Sci and Med* 50:1451 – 61
- 34 27. Acka CA, Raso G, N'Goran EK, Tschannen AB, Bogoch II, et al. (2010) Parasitic  
35 Worms: Knowledge, Attitudes, and Practices in Western Côte d'Ivoire with  
36 Implications for Integrated Control. *PLoS Negl Trop Dis* 4(12): e910.
- 37 28. Nasr NA, Al-Mekhlaf H, Ahmed A, Aidil MR, Bulgiba A (2013) Towards an effective  
38 control programme of soil-transmitted helminth infections among Orang Asli in  
39 rural Malaysia. Part 2: Knowledge, attitude, and practices. *Parasites & Vectors* 6:28

40

41

## 1 **Figure Legends**

2 **Fig1. Multivariate analysis using CART to identify determinants of KAP for**  
3 **onchocerciasis. GK indicates good knowledge.**

4

5 **Fig2. Multivariate analysis using CART to identify determinants of KAP for LF. GK**  
6 **indicates good knowledge.**

7

8 **Fig3. Multivariate analysis using CART to identify determinants of KAP for STH. GK**  
9 **indicates good knowledge.**

10

11

## 12 **Tables**

13 **Table 1. Socio-demographic and socio-economic characteristics**

| <b>Characteristics</b> | <b>Number (%)</b> | <b>Characteristics</b>   | <b>Number (%)</b> |
|------------------------|-------------------|--------------------------|-------------------|
| <b>Urbanization</b>    |                   | <b>Sex</b>               |                   |
| Rural                  | 230 (46.5)        | Female                   | 247 (48)          |
| Semi urban             | 202 (40.8)        | Male                     | 267 (52)          |
| Urban                  | 63 (12.7)         | <b>Age</b>               |                   |
|                        |                   | [10 – 21[                | 100 (19.5)        |
| <b>Occupation</b>      |                   | [21 – 31[                | 126 (24.5)        |
| Driver                 | 12 (2.3)          | [31 – 100]               | 288 (56)          |
| Farmer                 | 259 (50.4)        | <b>Educational level</b> |                   |
| Student                | 110 (21.4)        | Illiterate               | 50 (9.9)          |
| Teacher                | 14 (2.7)          | Primary                  | 243 (47.9)        |
| Technician             | 34 (6.6)          | Secondary                | 189 (37.3)        |
| Trader                 | 51 (9.9)          | Higher                   | 25 (4.9)          |
| Other                  | 34 (6.6)          |                          |                   |

14

15

**1 Table 2. Knowledge, attitude and practice of populations with regards to  
2 onchocerciasis, lymphatic filariasis and soil transmitted helminthiasis**

| <b>Indicative questions</b>            | <b>Response categories</b>   | <b>Oncho<br/>N (%)</b> | <b>LF<br/>N (%)</b> | <b>STH<br/>N (%)</b> |
|----------------------------------------|------------------------------|------------------------|---------------------|----------------------|
| Have you heard about this NTD?         | Yes                          | 212 (41.2)             | 379 (73.7)          | 462 (89.9)           |
|                                        | No                           | 300 (58.4)             | 132 (25.7)          | 50 (9.7)             |
|                                        | Refuse to answer             | 2 (0.4)                | 3 (0.6)             | 2 (0.4)              |
| If « Yes »                             |                              |                        |                     |                      |
| By which means?                        | Radio                        | 21 (10.0)              | 23 (6.1)            | 5 (1.1)              |
|                                        | Television                   | 5 (2.3)                | 11 (2.9)            | 4 (0.9)              |
|                                        | Poster                       | 9 (4.2)                | 34 (9.0)            | 2 (0.4)              |
|                                        | Health personnel             | 86 (41.1)              | 111 (29.3)          | 284 (61.5)           |
|                                        | Member of the community      | 98 (46.2)              | 220 (58.0)          | 156 (33.8)           |
| How can you get this disease?          | Flies                        | 19 (9.0)               | 13 (3.4)            | NA                   |
|                                        | Mosquito                     | 21 (10.0)              | 35 (9.2)            | NA                   |
|                                        | Inherited from parent/family | 2 (0.9)                | 1 (0.3)             | NA                   |
|                                        | Worms enter through the foot | NA                     | NA                  | 4 (0.9)              |
|                                        | Bad hygiene*                 | NA                     | NA                  | 151 (32.7)           |
|                                        | Not washing hands            | NA                     | NA                  | 22 (4.8)             |
|                                        | Inherited from parent/family | NA                     | NA                  | 1 (0.2)              |
|                                        | Don't know                   | 145 (68.4)             | 308 (81.3)          | 255 (55.2)           |
| What does this disease cause?          | Pruritus or itching          | 0 (0)                  | NA                  | NA                   |
|                                        | Skin disease                 | 6 (2.8)                | NA                  | NA                   |
|                                        | Eye disease                  | 155 (73.1)             | NA                  | NA                   |
|                                        | Elephantiasis                | NA                     | 328 (86.5)          | NA                   |
|                                        | Hydrocele                    | NA                     | 9 (2.4)             | NA                   |
|                                        | Stomachache                  | NA                     | NA                  | 329 (71.2)           |
|                                        | Diarrhea                     | NA                     | NA                  | 75 (16.2)            |
|                                        | Vomiting                     | NA                     | NA                  | 67 (14.5)            |
|                                        | Don't know                   | 48 (22.6)              | 42 (11.1)           | 42 (9.1)             |
| How can you prevent this disease?      | Take Medicine                | 41 (19.3)              | 57 (15.0)           | 136 (29.4)           |
|                                        | Kill flies                   | 8 (3.8)                | 10 (2.6)            | NA                   |
|                                        | Use a bed net                | 8 (3.8)                | 5 (1.3)             | NA                   |
|                                        | Use latrines                 | NA                     | NA                  | 2 (0.4)              |
|                                        | Good Hygiene**               | NA                     | NA                  | 80 (17.3)            |
|                                        | Don't know                   | 146 (68.9)             | 307 (81.0)          | 226 (48.9)           |
| What can you do to treat this disease? | Take medicine                | 91 (42.9)              | 112 (29.6)          | 342 (74.0)           |
|                                        | Kill Flies                   | 0 (0)                  | 0 (0)               | NA                   |
|                                        | Use latrines                 | NA                     | NA                  | 2 (0.4)              |
|                                        | Good hygiene**               | NA                     | NA                  | 2 (0.4)              |
|                                        | Don't know                   | 112 (52.8)             | 234 (61.7)          | 112 (24.2)           |

## 1 **Supporting information**

2 **S1 Table. Descriptive statistics of scores of KAP (DOCX)**

3

4 **S2 Table. Univariate analysis of NTDs by socio-demographic characteristics**  
5 **(DOCX)**

6

7 **S3. Table. Analysis of behavioral classes and determinants of KAP about**  
8 **onchocerciasis (DOCX)**

9

10 **S4. Table. Analysis of behavioral classes and determinants of KAP about FL**  
11 **(DOCX)**

12

13 **S5. Table. Analysis of behavioral classes and determinants of KAP about STH**  
14 **(DOCX)**

Job = Farmer, Student, Other

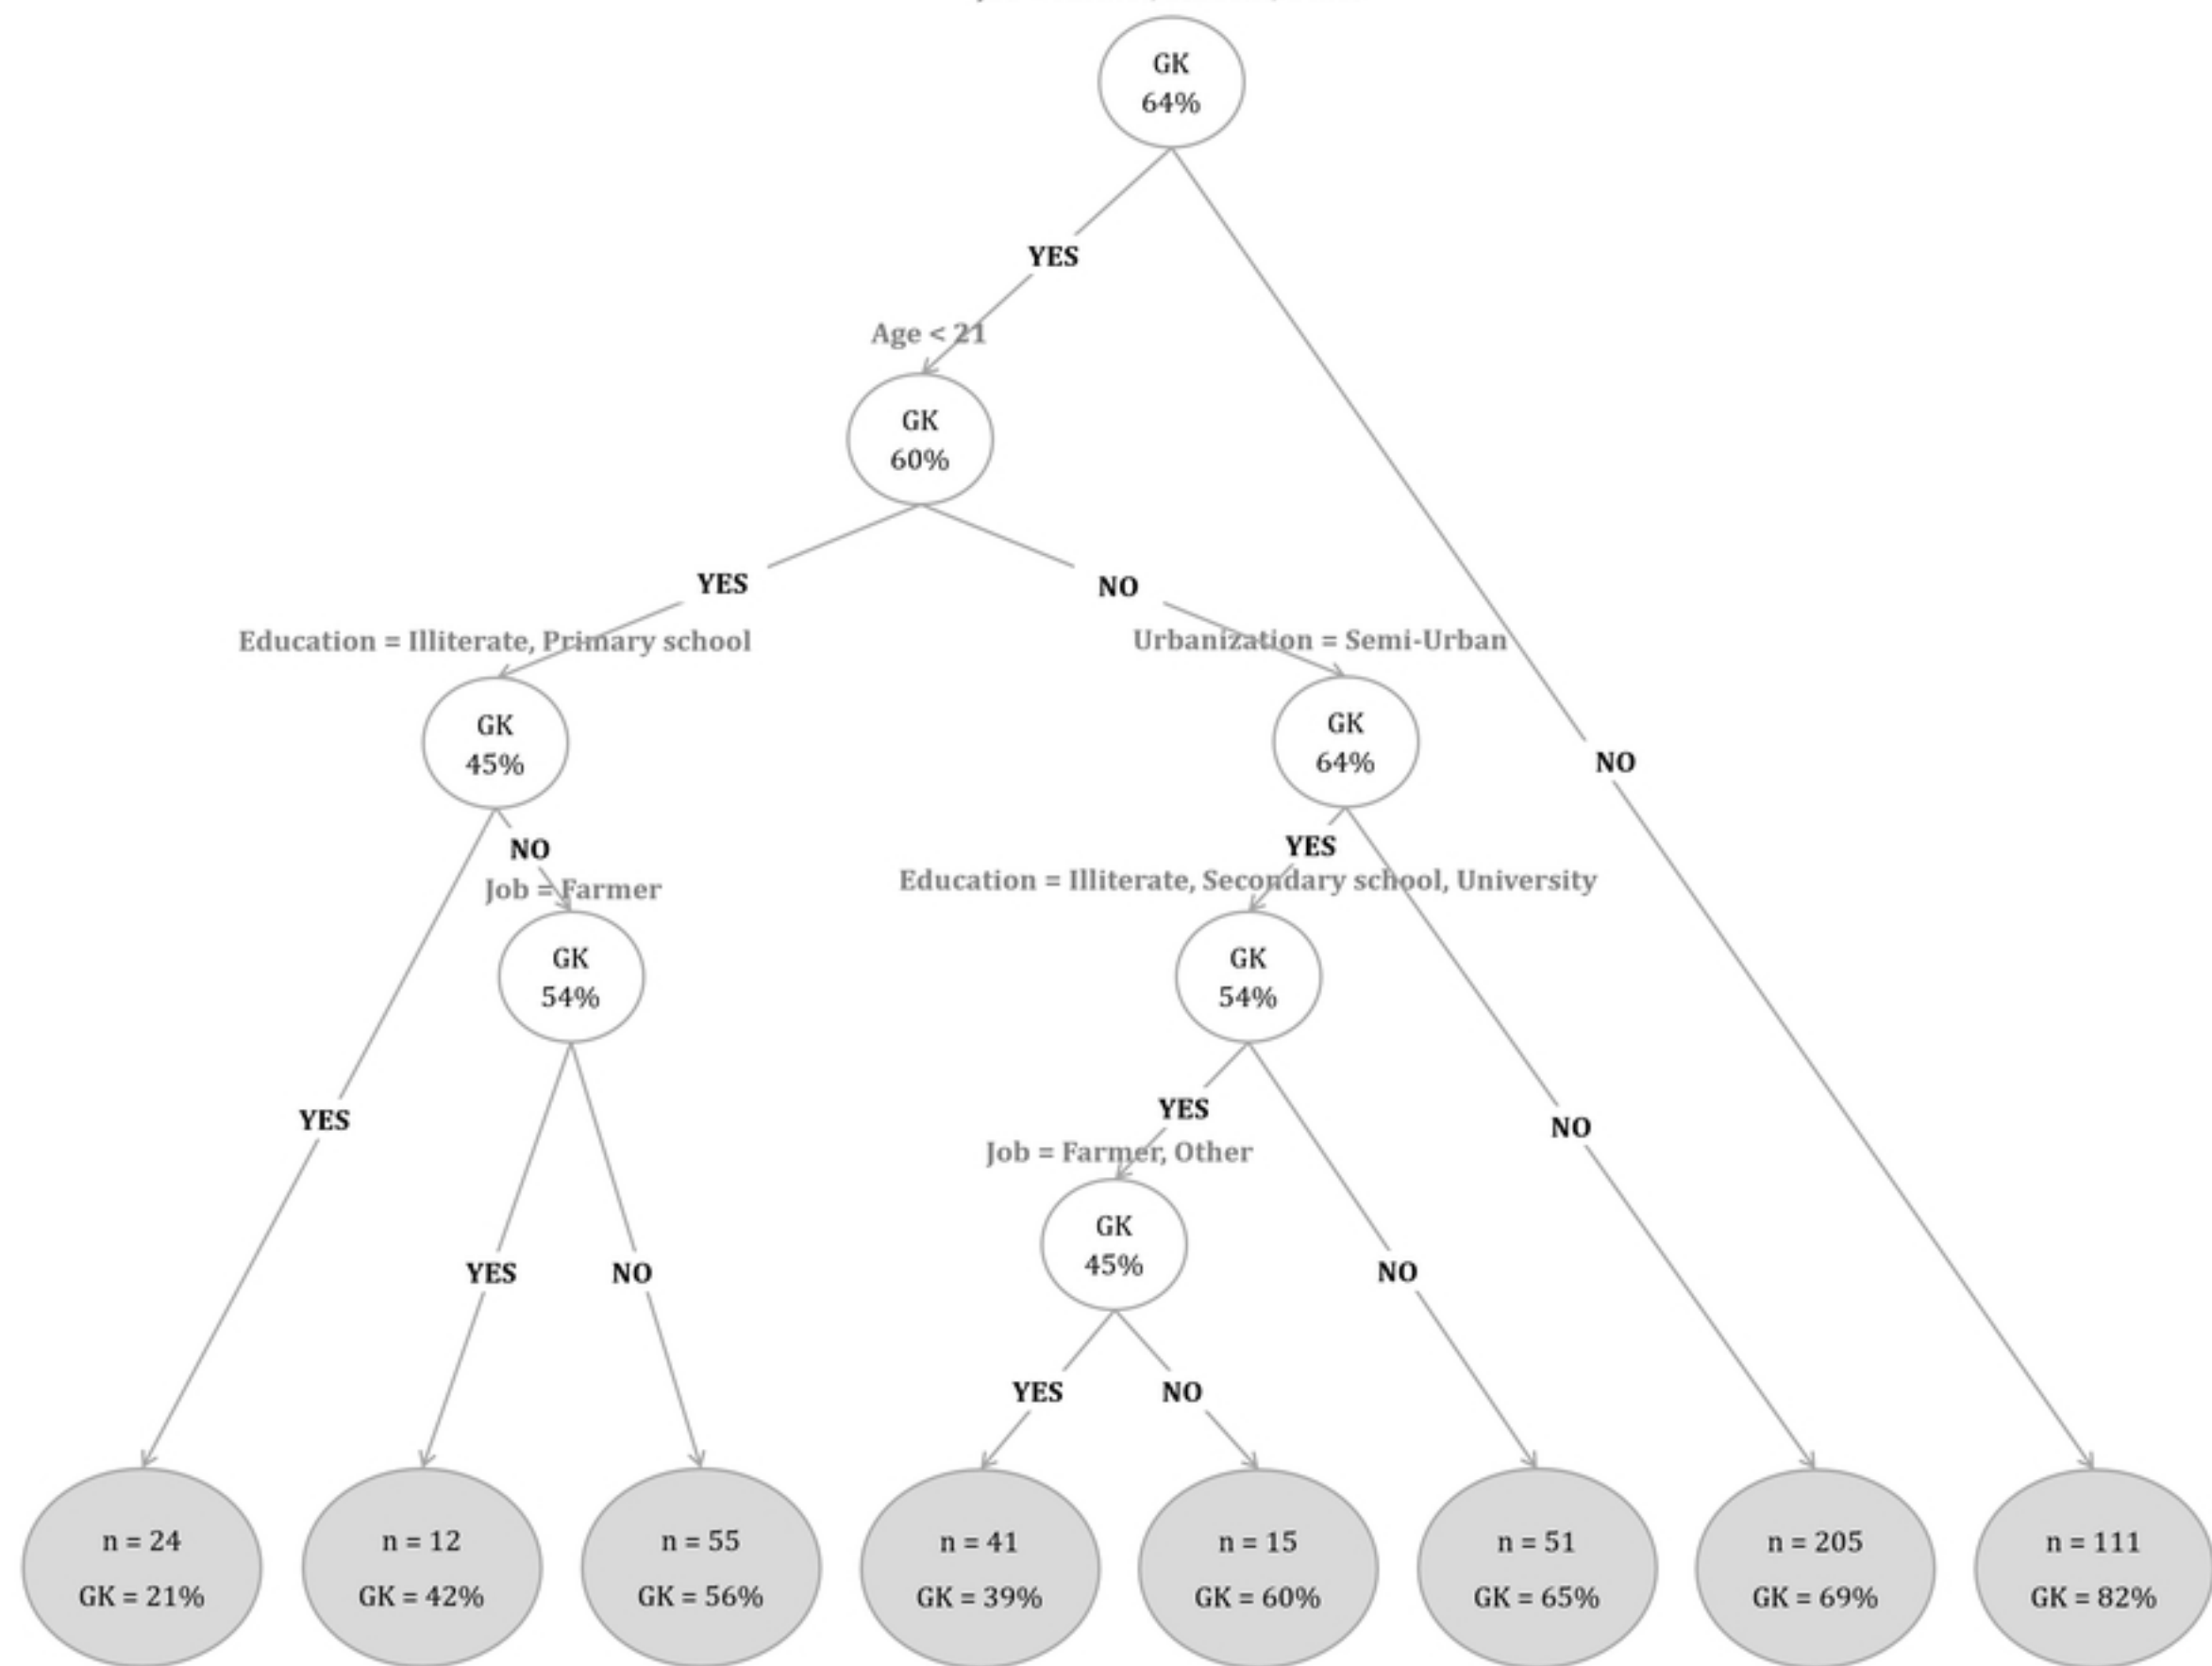

Figure 1



Job = Driver, Farmer, Student, Technician,  
Trader, Other

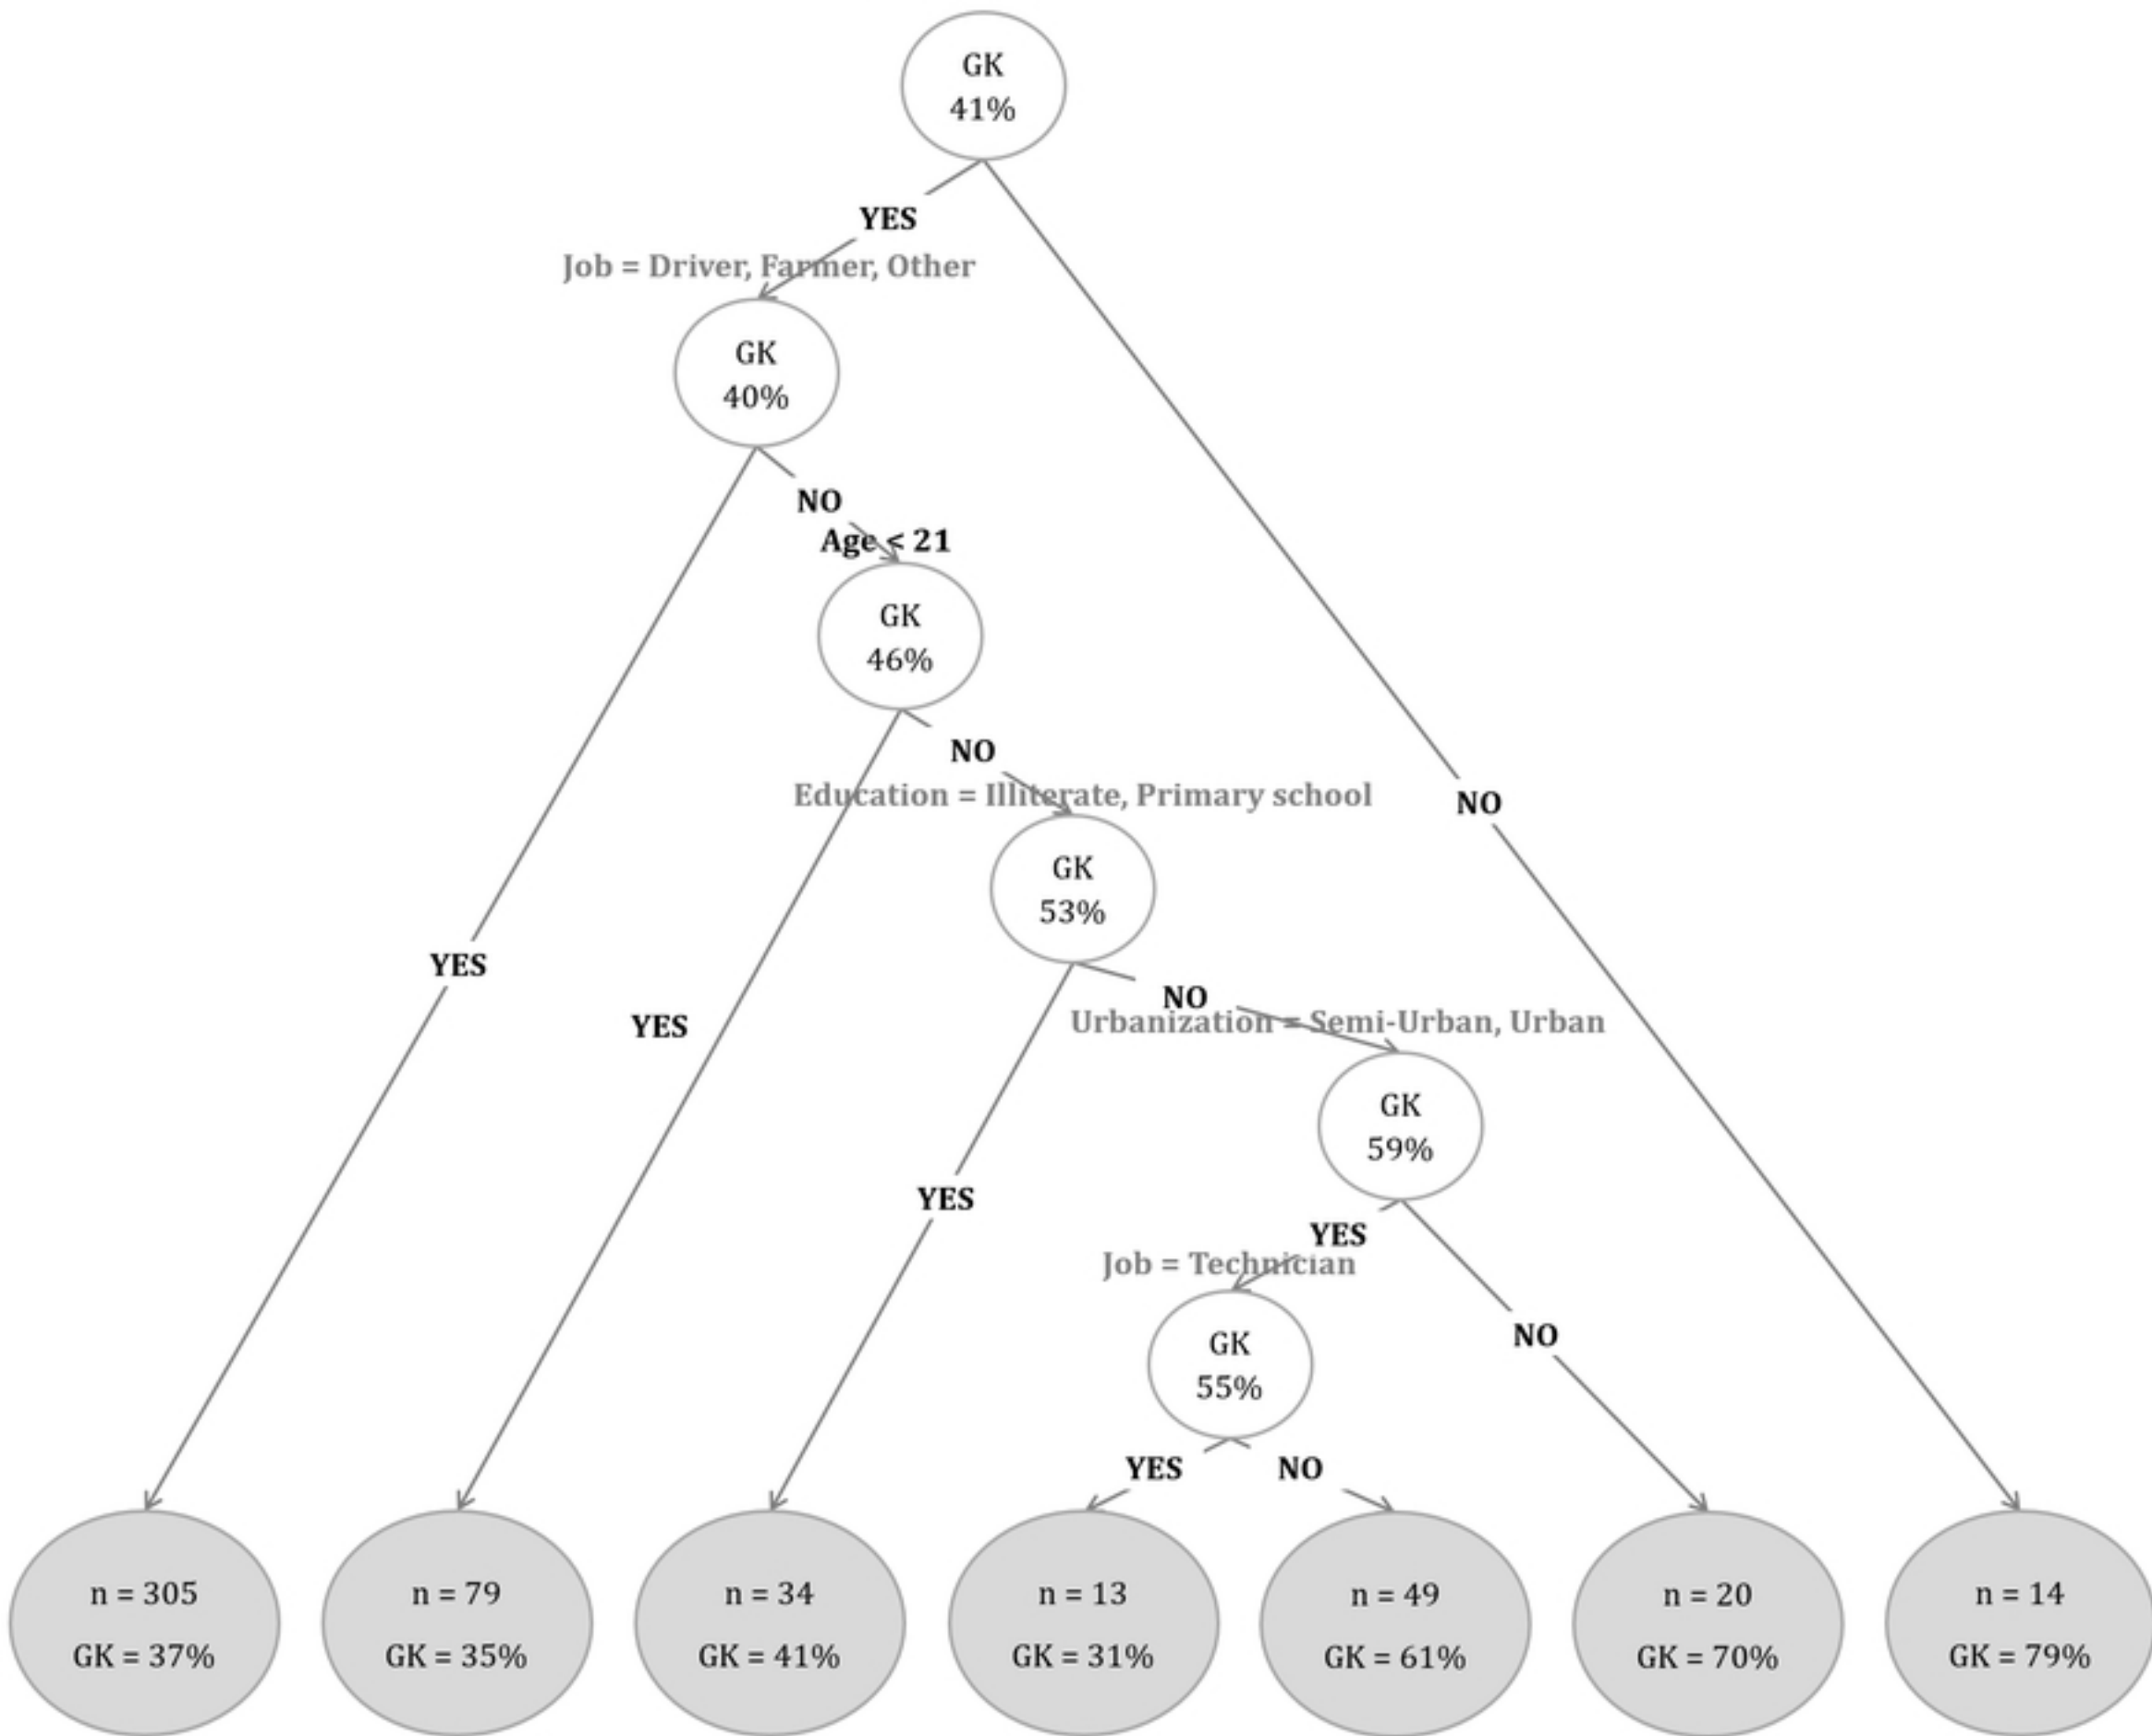

Figure2

# Job = Student, Other

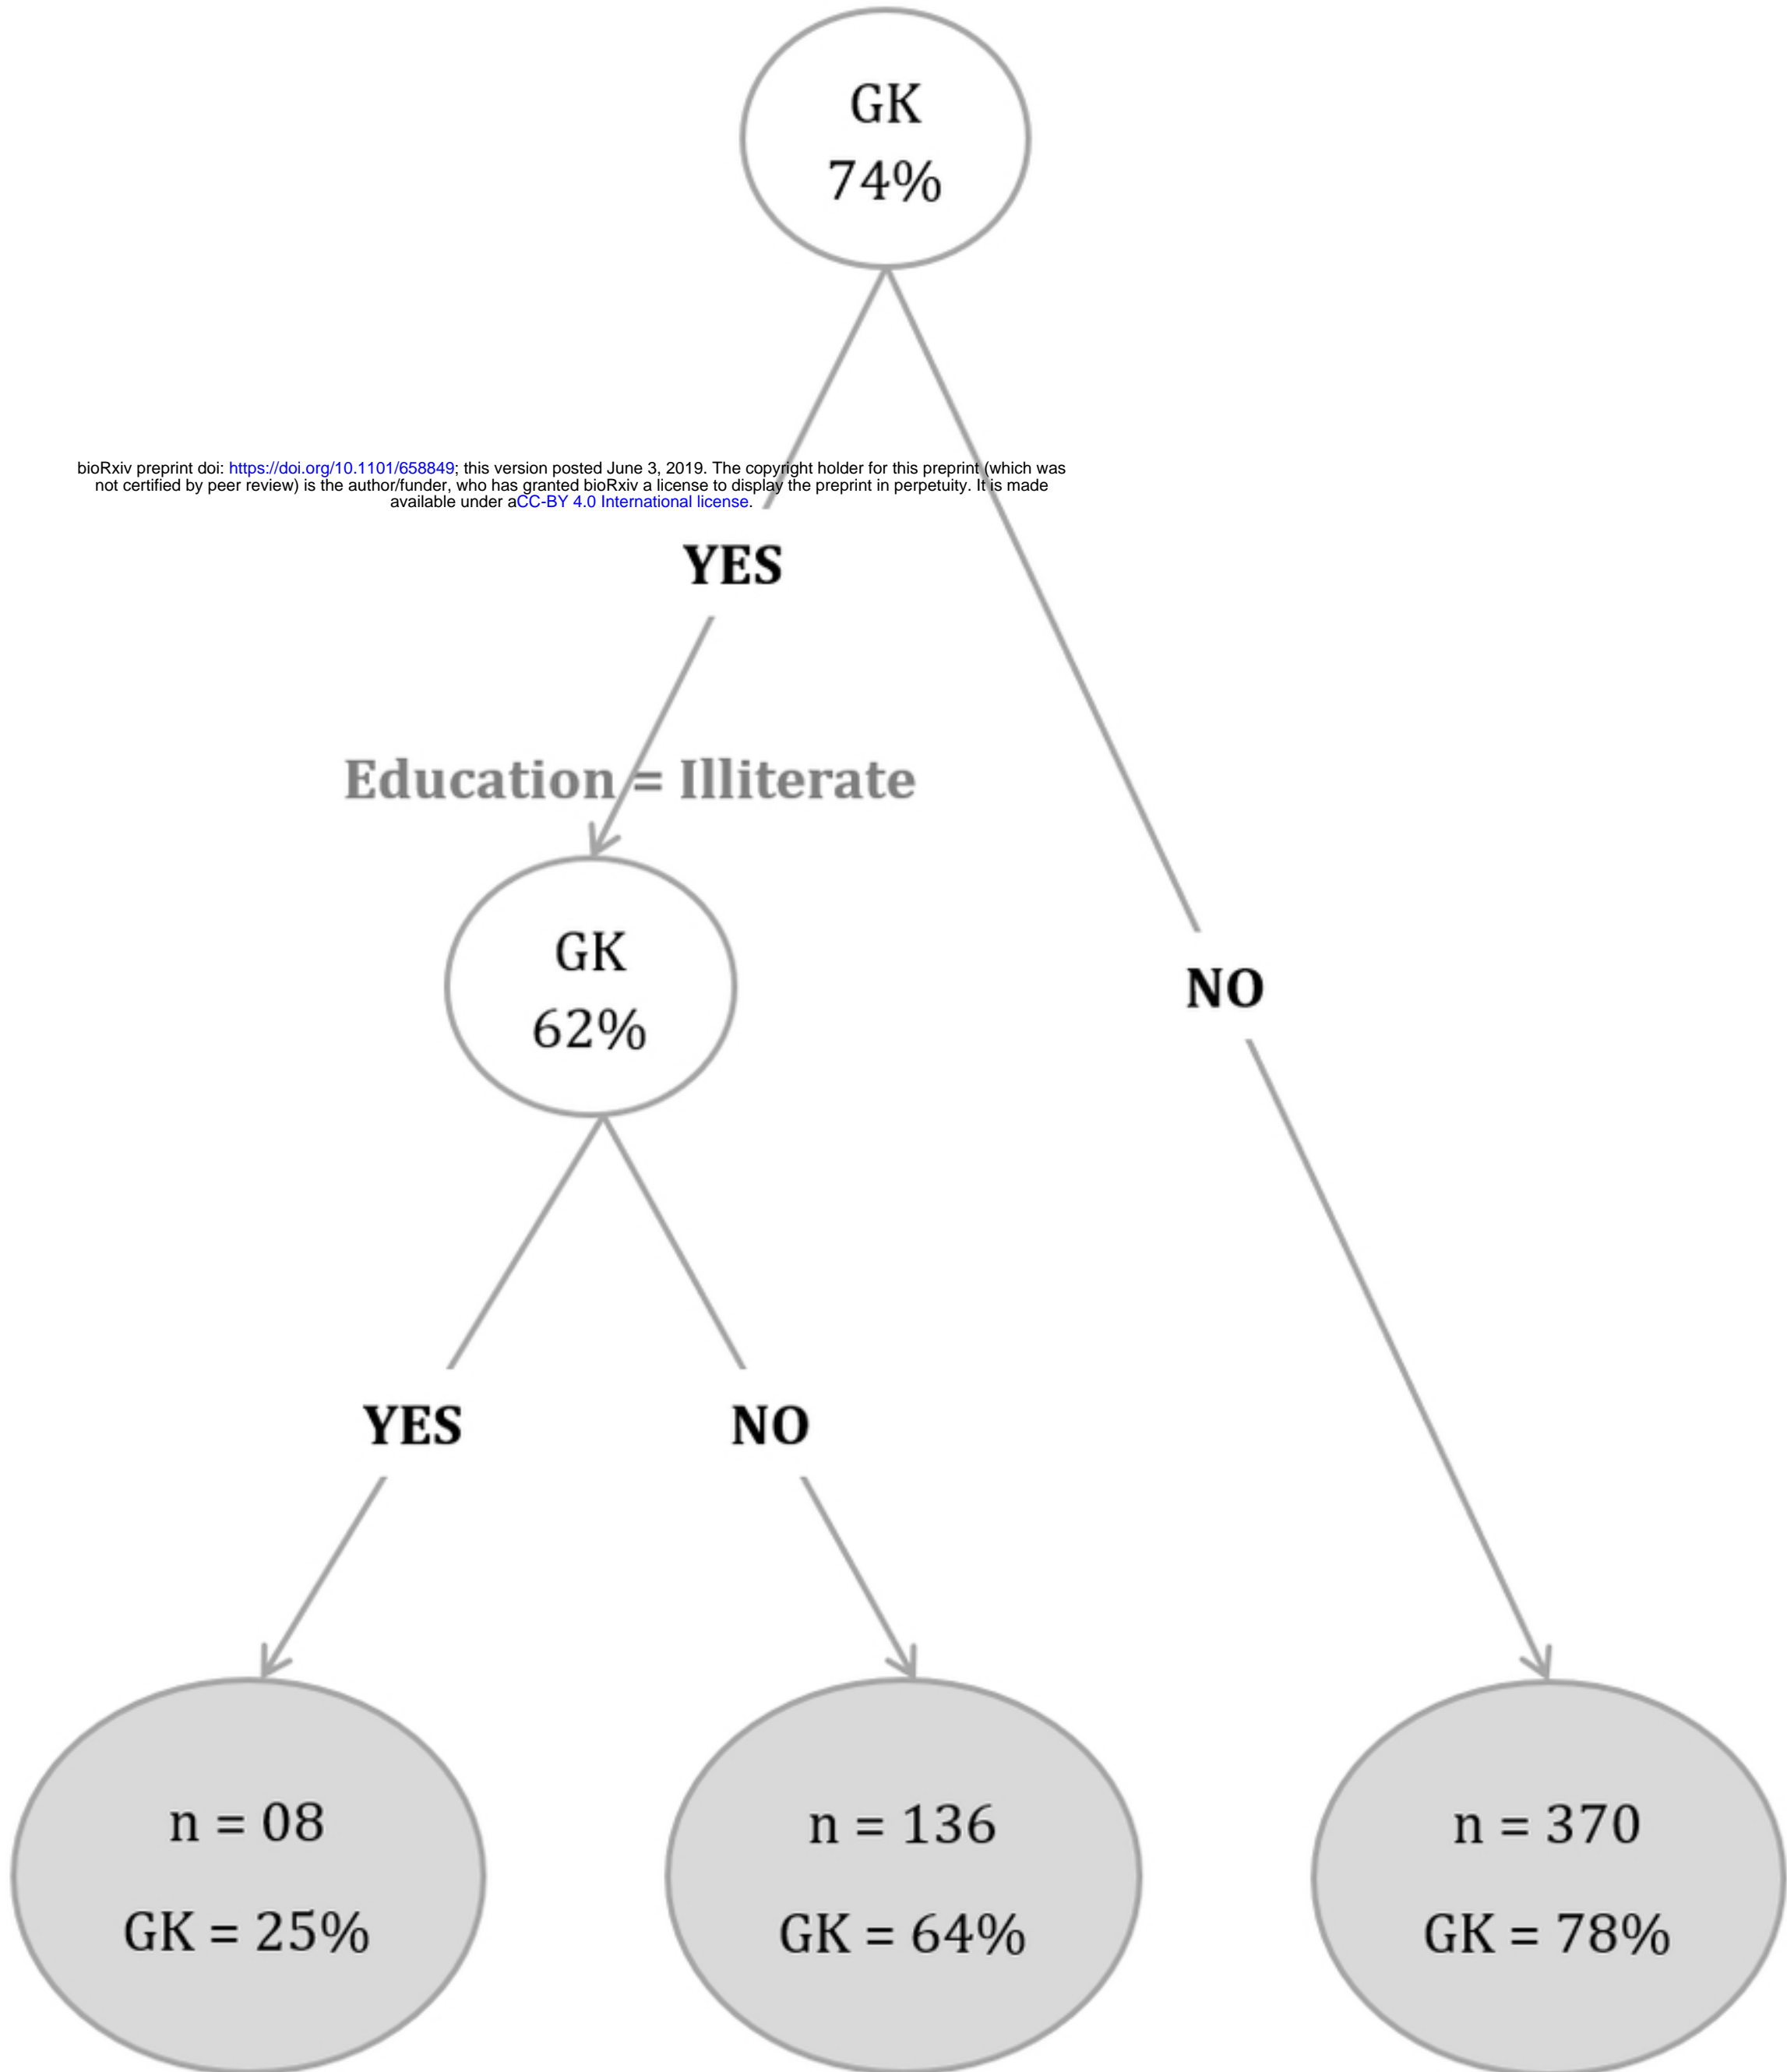

Figure3
